# Supplementary material
Source: PubMed Central journal article supplement (PMC6579651)
Supplement: supp_7.2.E405_2018-0172-3-at.pdf [file supp_7.2.E405_2018-0172-3-at.pdf]

**Appendix 3 (as supplied by the authors): Barriers and enablers to adoption and implementation of the Primary Care Assessment and Research of a Telephone Intervention for Neuropsychiatric Conditions with Education and Resources study at different stages of implementation**

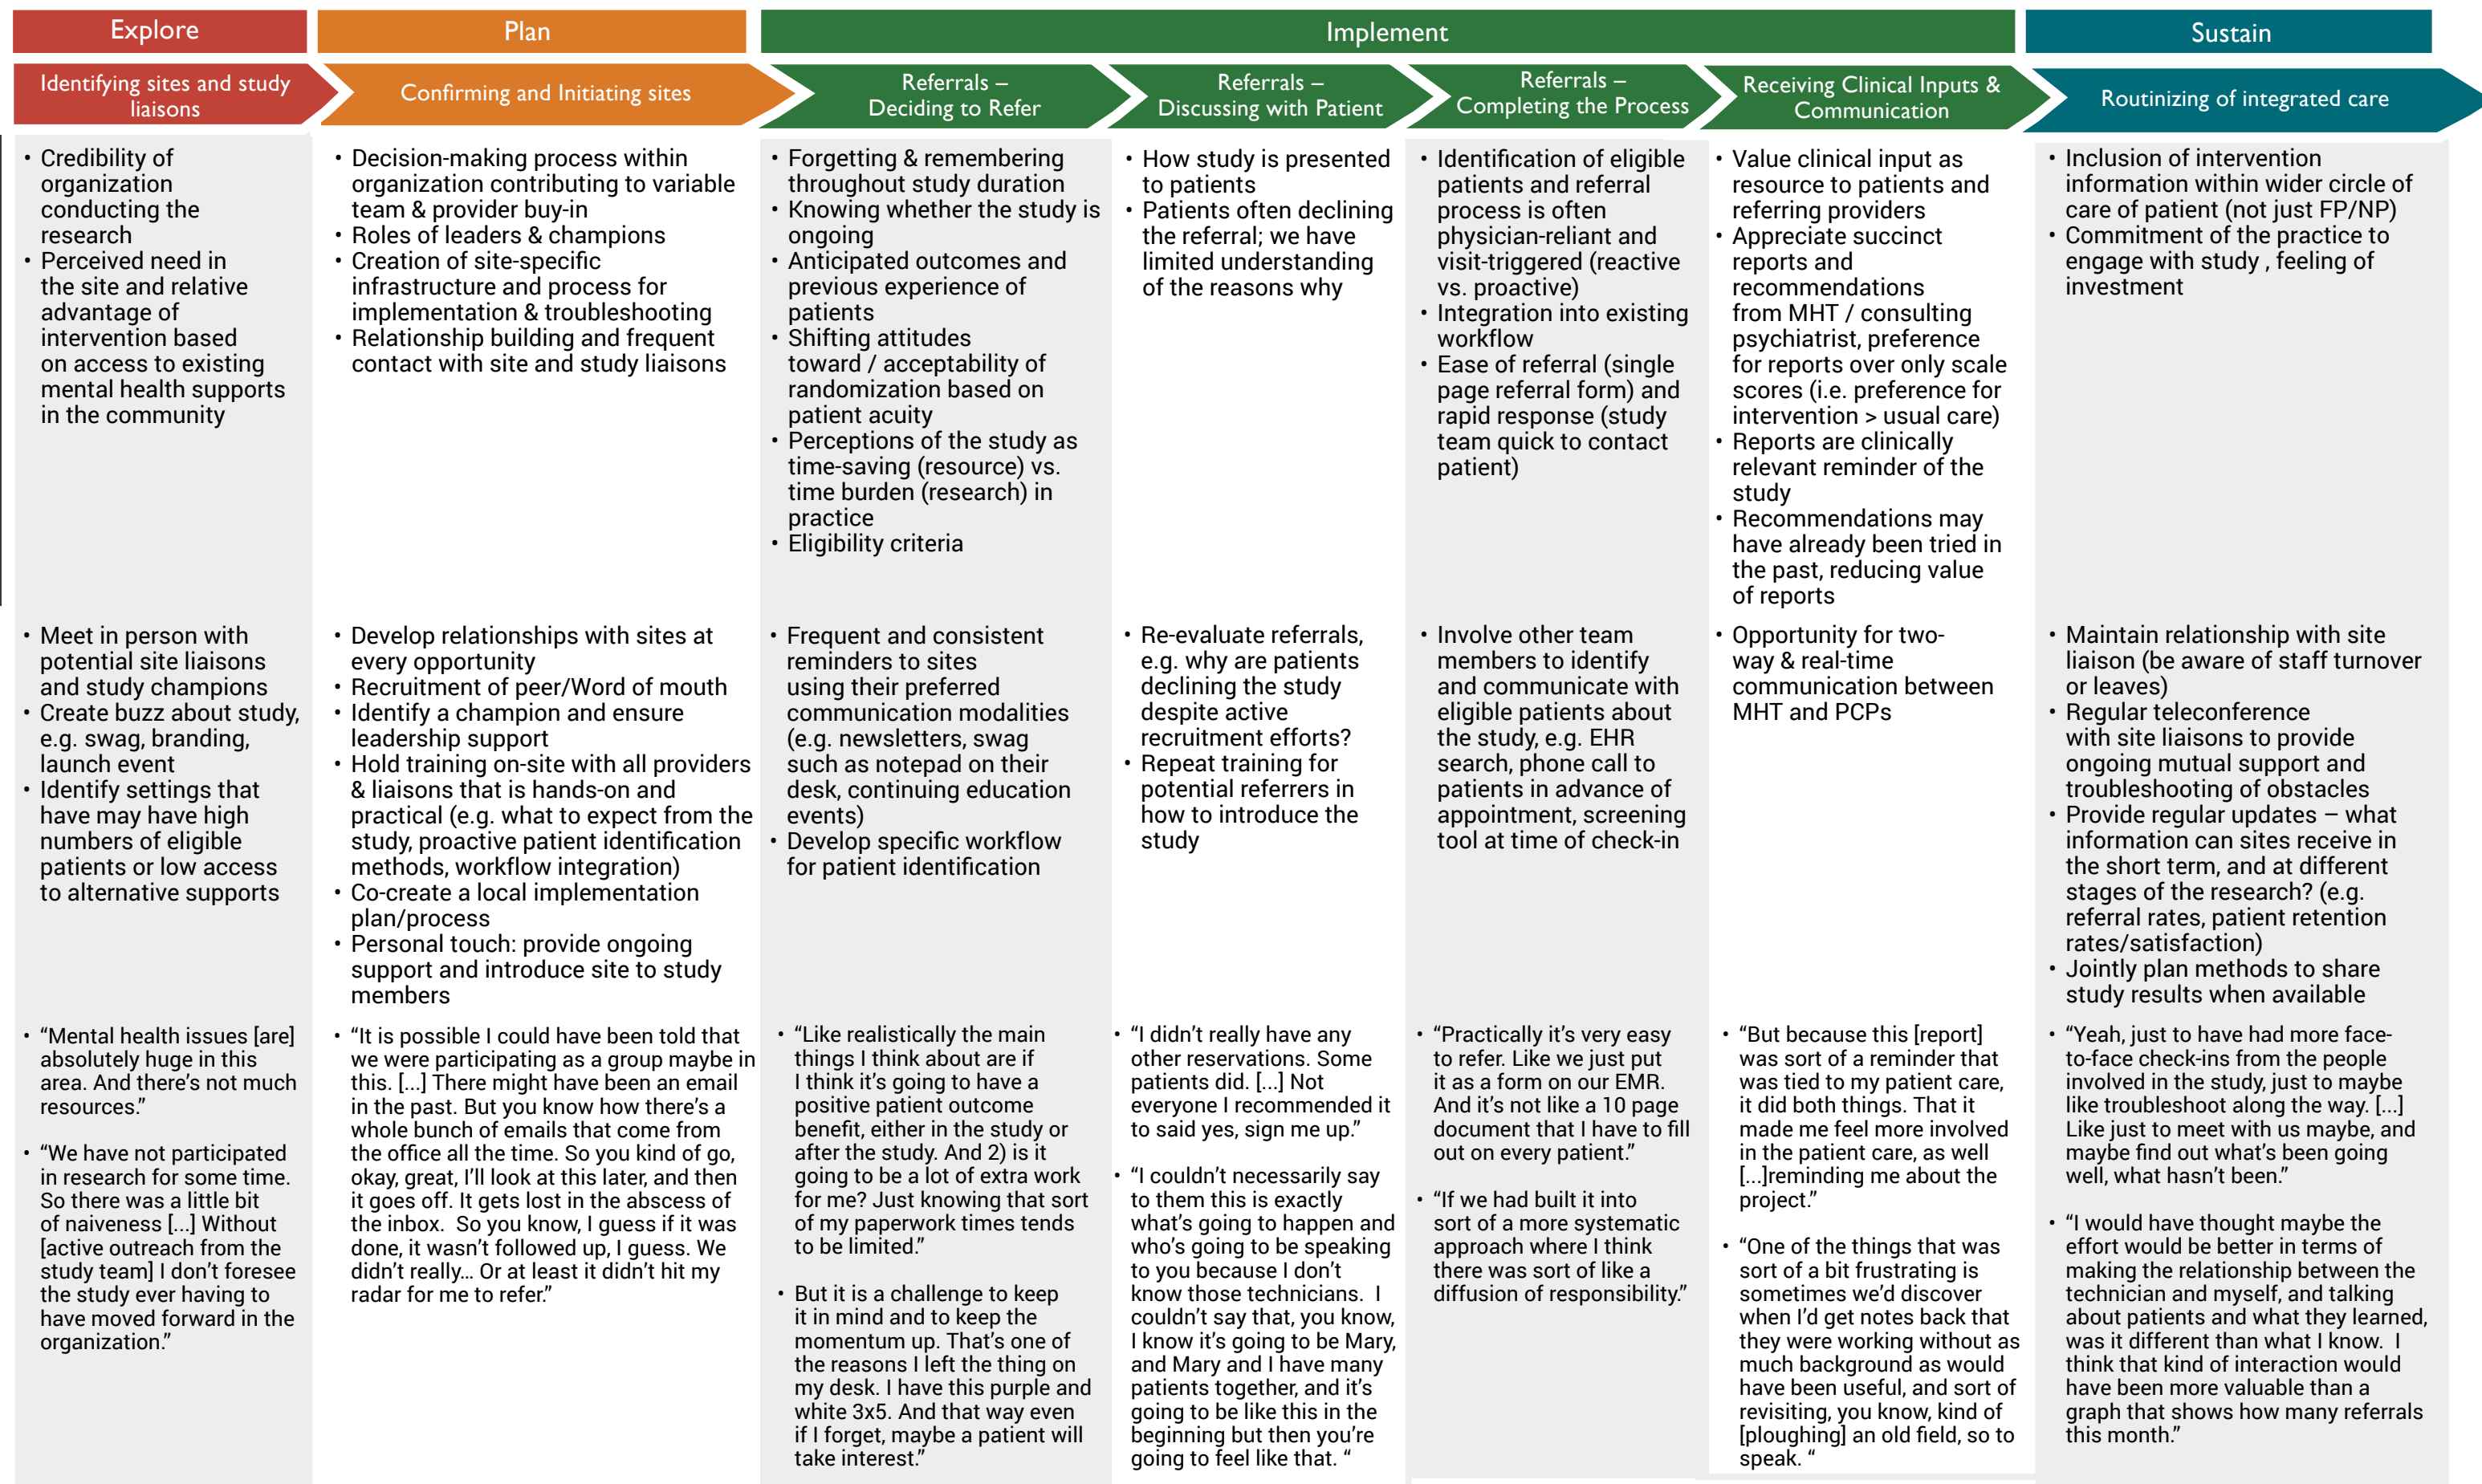

Longitudinal Relationship Building with Sites

- Collaboration in research - Engaging Providers as Co-Investigators/Collaborators/Advisors (ongoing relationship, establishing network of providers invested in research, establishing mutual expectations)
- Community engagement and responsiveness – What else can sites be offered? Consultation for patients ineligible for the study? Accredited educational events?
- Support building QI capacity – Will enhance study implementation and have broader benefits to the site
